# Supplementary material for: Glioblastomas with primitive neuronal component harbor a distinct methylation and copy-number profile with inactivation of TP53, PTEN, and RB1
Source: PubMed Central journal article supplement (PMC8217054; doi:10.1007/s00401-021-02302-6), 2021-04-19

Supplementary Figure 1

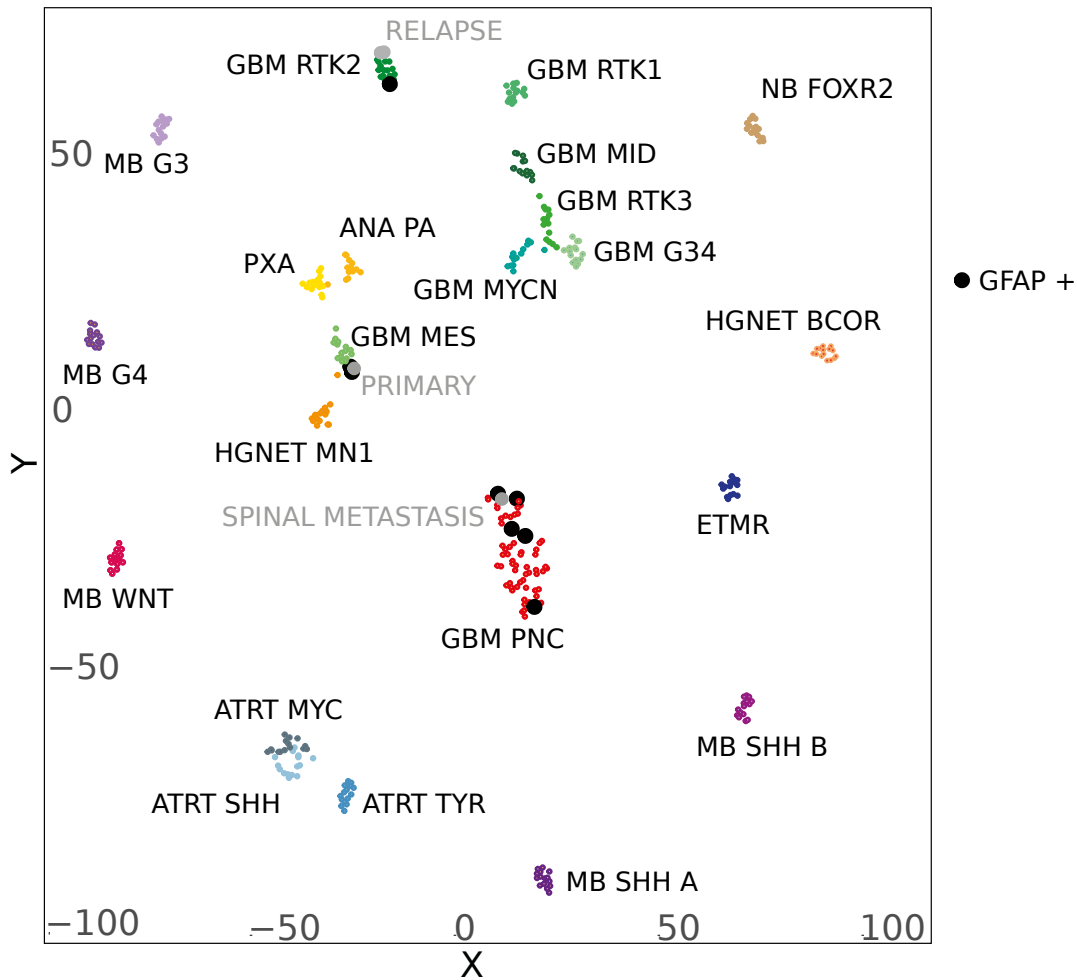

Supplementary Figure 2

**a**

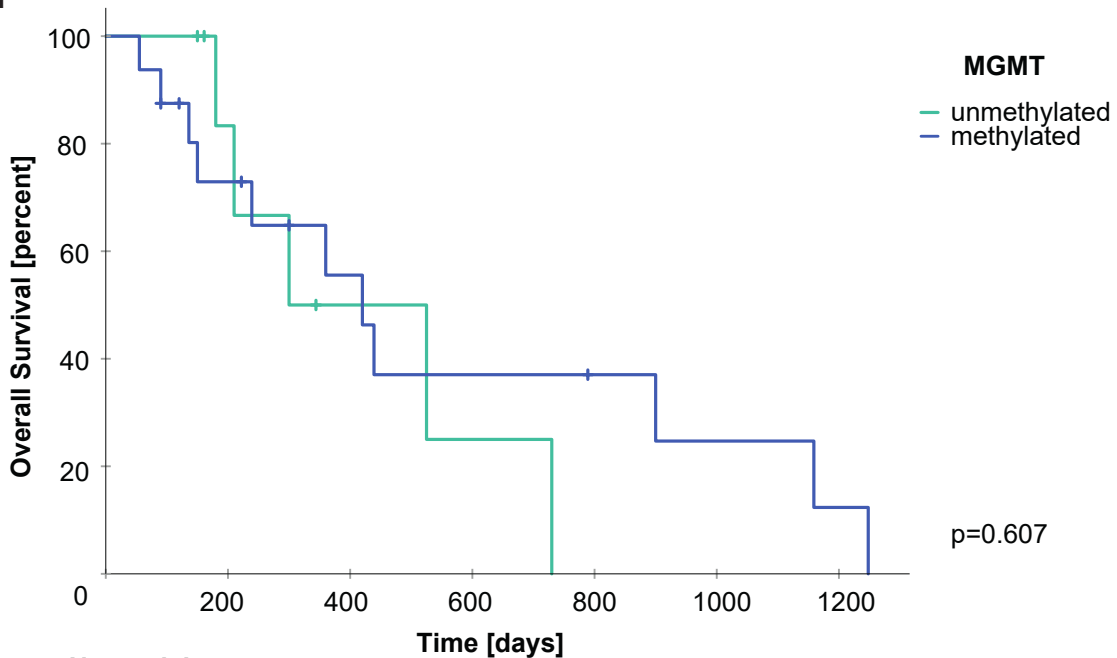

No. at risk

|      |    |   |   |   |   |   |
|------|----|---|---|---|---|---|
| — 16 | 10 | 6 | 4 | 3 | 2 | 1 |
| — 8  | 5  | 2 | 1 | 0 | 0 | 0 |

**b**

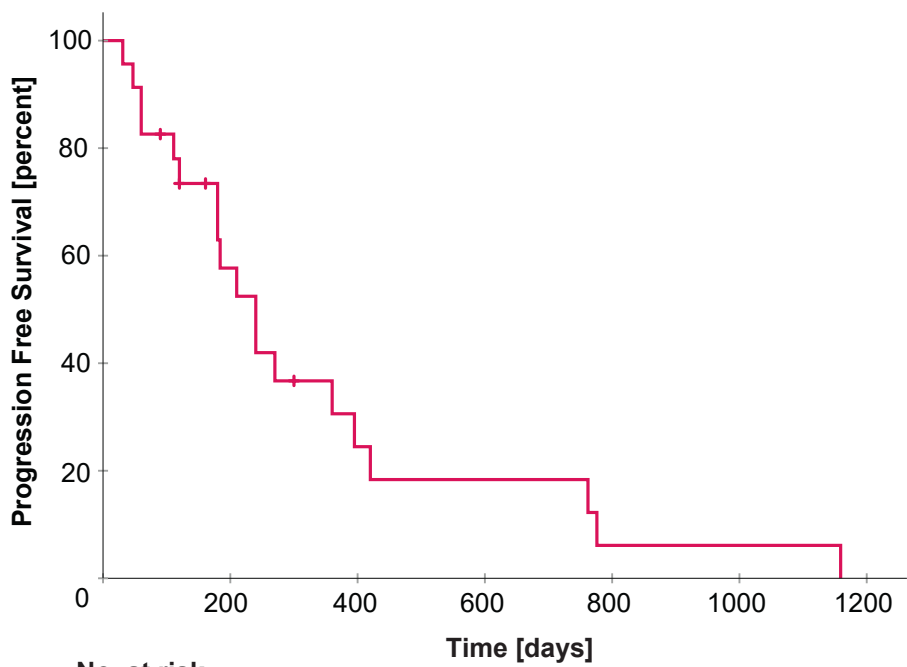

No. at risk

|    |    |   |   |   |   |   |
|----|----|---|---|---|---|---|
| 23 | 11 | 4 | 3 | 1 | 1 | 0 |
|----|----|---|---|---|---|---|

### Supplementary Figure 3

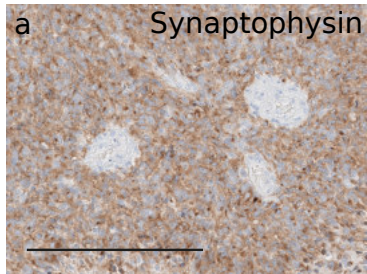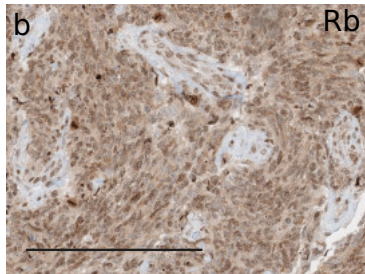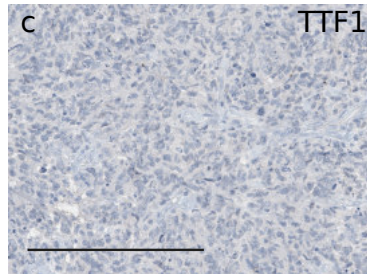

Supplement: 401_2021_2302_MOESM1_ESM.pdf [file 401_2021_2302_MOESM1_ESM.pdf]
